# Supplementary material
Source: Elsevier journal article supplement (https://www.sciencedirect.com/science/article/pii/S0870255122001664)
Supplement: mmc1 [file S0870255122001664:mmc1.pdf]

## Supplementary material

**Supplementary Table S1** Multiple regression model for change in high-density lipoprotein cholesterol between baseline and final visit.

| Variables included in the regression model <sup>a</sup> | Partial regression coefficients |                | p      |
|---------------------------------------------------------|---------------------------------|----------------|--------|
|                                                         | ββ                              | 95% CI         |        |
| Initial model                                           |                                 |                |        |
| Gender (ref: female gender)                             | -4.16                           | -6.43 to -1.88 | <0.001 |
| Statins (ref: no)                                       | 6.49                            | 2.51 to 10.46  | 0.001  |
| ARBs (ref: no)                                          | 0.40                            | -1.82 to 2.61  | 0.724  |
| Antiplatelets (ref: no)                                 | 1.47                            | -0.78 to 3.72  | 0.201  |
| SRIs (ref: no)                                          | 2.72                            | 0.01 to 5.43   | 0.049  |
| Optimized final model                                   |                                 |                |        |
| Gender (reference: female)                              | -5.08                           | -7.19 to -2.97 | <0.001 |
| Statins (ref: no)                                       | 7.44                            | 3.71 to 11.17  | <0.001 |

ARBs: angiotensin receptor blockers; CI: confidence interval; ref: reference; SRIIs: serotonin reuptake inhibitors.

<sup>a</sup> p of the model: p<0.001. Adjusted R<sup>2</sup>=0.060 (the model explains 6.0%).

**Supplementary Table S2** Multiple regression model for change in low-density lipoprotein cholesterol between baseline and final visits.

| Variables included in the regression model <sup>a</sup> | Partial regression coefficients |                  | p      |
|---------------------------------------------------------|---------------------------------|------------------|--------|
|                                                         | β                               | 95% CI           |        |
| Initial model                                           |                                 |                  |        |
| Age (continuous)                                        | -0.02                           | -0.34 to 0.30    | 0.910  |
| Statins (ref: no)                                       | -48.56                          | -61.40 to -35.71 | <0.001 |
| ACEIs (ref: no)                                         | -6.95                           | -15.71 to -1.82  | 0.120  |
| ARBs (ref: no)                                          | -6.20                           | -13.66 to 1.27   | 0.105  |
| Oral antidiabetic drugs (ref: no)                       | -1.62                           | -9.67 to 6.43    | 0.695  |
| Antiplatelets (ref: no)                                 | -6.40                           | -14.70 to 1.91   | 0.214  |
| CCBs (ref: no)                                          | -3.23                           | -12.03 to 5.57   | 0.468  |
| Allopurinol (ref: no)                                   | -3.99                           | -11.51 to 3.53   | 0.317  |
| Optimized final model                                   |                                 |                  |        |
| Statins (ref: no)                                       | -51.78                          | -64.28 to -39.28 | <0.001 |
| ACEIs (ref: no)                                         | -12.56                          | -19.78 to -5.35  | 0.001  |
| ARBs (ref: no)                                          | -8.22                           | -15.33 to -1.11  | 0.024  |

ACEIs: angiotensin-converting enzyme inhibitors; ARBs: angiotensin receptor blockers; CCBs: calcium channel blockers; CI: confidence interval; ref: reference; SRIIs: serotonin reuptake inhibitors.

<sup>a</sup> p of the model: p<0.001. Adjusted R<sup>2</sup>=0.210 (the model explains 21%).
